# Supplementary material
Source: Springer Nature journal article supplement (https://www.springermedizin.de/resource/supplementary/13075_2009_2909_MOESM2_ESM.pdf/9693162)

1 day

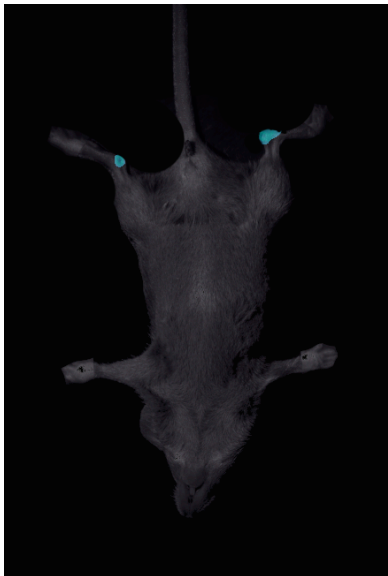

4 days

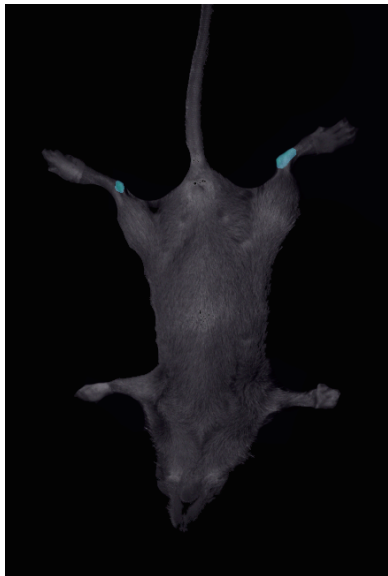

2100

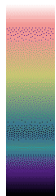

0

11 days

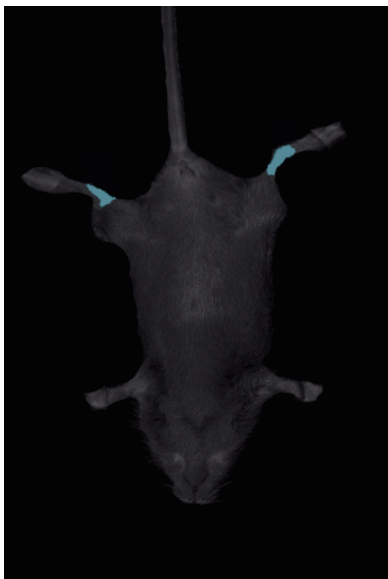

18 days

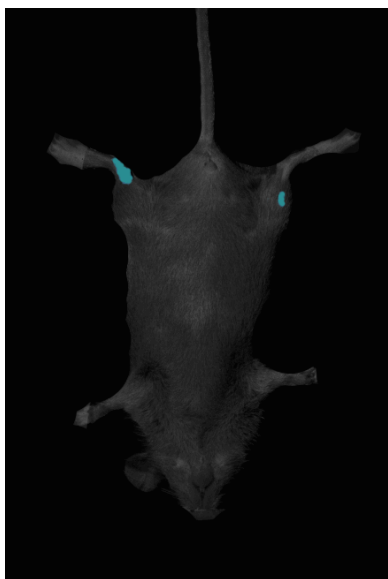

2100



0

Supplement: MOESM2 [file 9693162]
